# Supplementary material
Source: PubMed Central journal article supplement (PMC3479610)
Supplement: 1207906109_pnas.201207906SI.pdf [file 1207906109_pnas.201207906SI.pdf]

# Supporting information

Schillmiller et al. 10.1073/pnas.1207906109

## SI Materials and Methods

**PCR Primer List.** Virus-induced gene silencing (VIGS) primers containing ligation independent cloning (LIC) cloning adapters:

AT1-F: 5'-CGACGACAAGACCCTCATTGTTGGGTCAGCC-  
CCGTTG-3'  
AT1-R: 5'-GAGGAGAAGAGCCCTATTTCCCTTCCTTG-  
ATGTTGTGTTATTG-3'  
AT2-F: 5'-CGACGACAAGACCCTGCCAAGAAAATGCA-  
ACAGGTA-3'  
AT2-R: 5'-GAGGAGAAGAGCCCTATGATCATATGATG-  
AAGTGCTGTTTC-3'  
AT3-F: 5'-CGACGACAAGACCCTACGTTGTCGTCGAT-  
GCCTCAAGA-3'  
AT3-R: 5'-GAGGAGAAGAGCCCTTAGTGGTGCCATAA-  
AAGTCCATC-3'  
AT\*-F: 5'-CGACGACAAGACCCTGTTATTATAGTATC-  
TGTCATCAACCAAATCT-3'  
AT\*-R: 5'-GAGGAGAAGAGCCCTGTGTTAGTGTGCGC-  
CCATTTCATT-3'

Primers for creating tomato transformation constructs:

AT2F1-attB: 5'-AAAAAGCAGGCTGCCAAGAAAATGCA-  
ACAGGTA-3'  
AT2R1-attB: 5'-AGAAAGCTGGGTATGATCATATGATG-  
AAGTGCTGTTTC-3'

attB1 adapter: 5'-GGGGACAAGTTTGTACAAAAAAGC-  
AGGCT-3'

attB2 adapter: 5'-GGGGACCACTTTGTACAAGAAAGCT-  
GGGT-3'

pAT2-F1: 5'-CTGCAGTTACACCAAATCAATACATACA-  
TACCA-3'

AT2seqR1: 5'-ACGTTGGTTTTGTGATGAATGAAGAA-3'

pAT2-R: 5'-CTGCAGTTGGATGAATAAAGTGTGTTGTT-  
TCTG-3'

Primers for RT-PCR:

AT2-RTf: 5'-GATGAGGCAAGAAGAAAGGATGAT-3'

AT2-RTr: 5'-GTGATGAATGAAGAAGCAACAAGCAA-3'

**Acyl Sugar Substrate Preparation.** Acyl sugars were collected from IL1-3 plants by washing leaflets (1.5 g dry weight) in 30 mL of extraction solvent [acetonitrile/isopropanol/water 3:3:2 (vol/vol/vol) containing 0.1% (vol/vol) formic acid]. To partially purify acyl sugars, the extract was diluted (1:4) with water, then 20 mL were loaded onto two strong cation exchange solid phase extraction columns (Supleco, 500 mg bed weight) preequilibrated with 10% (vol/vol) acetonitrile. Acyl sugars were collected by eluting from each column with 3 mL 100% acetonitrile. After evaporation to dryness under vacuum, the resulting residue was dissolved in 600  $\mu$ L 50% (vol/vol) ethanol and used directly in the SIAT2 enzyme assays.

1 80

S1AT1 AAAGAGAAT ATTGTGTAAG ACTTTGAGAG CTATAAAAATA  
 SpA11 GAAT ATTGTGTCAG ATTTTGTAGAG CPATAGATA  
 S1AT2 G TGCCAAAATC AAGAACAACC TTTTGCCAAG AAAATGCAAC AGGTAAATATA  
 SpA22 **GTGCGATA ACTTATCGAC TTTCTGCAGG TTAGTATAAC AGATGATAAA**  
 S1AT3 CAGATTATGA GGGATAGTGT GAACGTGATT TTACATAATC AAAGAGAAT ATTGTGTAAG ATTTTCA---  
 SpA33 AA GGGATAGCGT GAACGTGATT TTGCATAATC AAAGAGAAT ATTGTGTAAG ATTTTCA---

81 160

S1AT1 CAATCATATT TGATAGGA---TGAAGAA AGTCTAACGC ACGATAATTG AAGCCCTAA ATTGTTTAA CCAATTTCCTA  
 SpA11 CAATCATATT TTATACGA---TGAAGAA AGCGTAACGT GCGGTAATTG AAGCCCTAA ATTGTTTAA CCAATTTCCTA  
 S1AT2 **TAGCGACATT TGACTGATAT GATTTAAAT ATTTACCTCG AAAATTTTGT AATTGTAATA ACITTTAGCG TAATTAACCG**  
 SpA22 **CAAAATATAAA ACACCAAAGT AAATGATAAG AGAGTGGTTC CTTATCCAGT CCTTTGTGG TTTGTTGACT TCTATCAG--**  
 S1AT3 CAATCTTATT TGATAGGA---TGAAGAA AGTCAACAC ATGA-----CCTAA ATTGTTTACT TAAATTTTTT  
 SpA33 CAATCTTATT TGATAGGA---TGAAGAA AGTCAAGAC ATGA-----CCTAA ATTGTTTAA TAAATTTCTA

161 240

S1AT1 ---TGCCATG TGTTTATTAA AA-TIAGTTG CATAAACATG CATCTTGAGC TGT-----GAAACTA ATGGCCTACC  
 SpA11 ---TGCCATG TGTTTATTAA AAATTACTTG CATAAACATG CATGTTGAGC TGTCTGTAGA GTTGAACCTA ATGGCCTACC  
 S1AT2 **CCCAAAATAAA TTCTGTAGTA TATACACTAG TGTCTGTCTT GAACAATGCA CTTTATGAAT GTTAAATGCA ATATATTAAA**  
 SpA22 **---ATTAC TTCTTACACA TAACCTCTAT TTGTCATTAA TAATGAAAGT TGTTAGATAT GGGGATCTCA TCAGCCAAAC**  
 S1AT3 ATTTTCCATG TGTTA-----TGATGG AGTAGTACTT AATAAATACT AATCAGATGG ATGAGTATTA AACTAATAAA  
 SpA33 --TTTCCATG TGTTA-----TG---G AGTAGTACTT AATAAATACT AATCAGATGG ATGAGTATTA AACTAATAC-

241 320

S1AT1 AAGTCTATGT ATGTATGTTT ATGTATATAT ATAGTAGCAA AAA-AAAGAG AGAAGCTA---CTCA AATCAAACTT  
 SpA11 AAGTCTATGT ATGTAT---AT ATAGTAGCAA AAA-AA-GAG AGAAGCTAAA GTAGAACTCA AATTAACCTT  
 S1AT2 **GATTGACGCC ATGCCAAACT ATATATATAA TA-----GGAATGAAC AT-----**  
 SpA22 **AAGGACTCT TTGCTTTTT TATTCCTAT TAATTTGAGG GGAATCAAG AG-----**  
 S1AT3 GATTAAAAAG TTGGGGAATT CTCTATATAT ATAGTACAAA GTTGAAGAG AGAATTA---  
 SpA33 GATTAAAAAG TTGGGGAATT CTCTATATAT ATAGTACAAA GTTGAAGAG AGAATTA---

321 400

S1AT1 CCTCGTTTGT TTATTAAGTA CTCATCCATC CACCAAATTA AAATCGTAA **TGGCTTGCAG --GTTAGATA TCGAAATTC**  
 SpA11 CCTCTTTTGT TTATTAAGTA CTCATCCATC CACCAAATTA AAATCGT-**AA TGGCCTGCAG --GTTAGATA TCGAAATTC**  
 S1AT2 **-----TGATAGATT TATTCAGAAA CAACACTTTA TTCATCCAAA AAAAAAGATG AATGTTTATA TTGAAATTC**  
 SpA22 **-----TTATAGAAC ATTTCTATG: TGGCAAACGA TCTAGATGAG AAGGAGTTA CATGAGTTT TCGAAATTC**  
 S1AT3 **-----AG TTATPATAGT ATCTGTCTATC AACCAAATC-----TAAT **GSTAATGCGC AAGTTAGATA TTGAAATTC****  
 SpA33 GCAATTAAG **TTATAACT ATCTGTCTATC AACCAAATC AAATCTAAT CTAATGCGC AAGTTAGATA TTGAAATTC**

401 480

S1AT1 ATCAAGGAAA TTGTTGAAAC CCTCAGCTTC TACTCCGGAT AATCTACGGA GGCTGAAGCT TTCCTTGTTC GATCAGCTGG  
 SpA11 GACAAGGAAA ATGTTGAAAC CGTCAGCTTC TACCCTGGAT AATCTACGGA GGCTGAAGCT TTCCTTGTTC GATCAGCTGT  
 S1AT2 **ATCAAGGAAA ATCGTGAAC CCTCAGCTTC TACCCTGGAT AATCTACGGA GATGGAAGCT TTCCTTGTTC GATCAGCTGT**  
 SpA22 **AGTAGAGCAA GGAACACACC TCTCAGCTTC AGCGTAGATG AAATACGCTC CATTAACCTGT GGCAGGCACA GAAATCAITTA**  
 S1AT3 **GACAAGGAAA ATATGAAAC CCTCAGCTTC TACACCAGAT AATCTTCGGA GACTGAAGAT TTCCTTGTTC GATCAGCTGG**  
 SpA33 **GACAAGGAAA ATGTTGAAAC CCTCAGCTTC TACACCAGAT AATCTTCGGA GACTGAAGAT TTCCTTGTTC GATCAGCTGG**

481 560

S1AT1 **CTCTTCGTAC ATATATACCG GTTCTCTTCA ACTACTTGCC GAGCAGCAGT TCAACATCAT ATGATGATGA -----**  
 SpA11 **CTCTTCGTAC ATATATACCG GTTCTCTTCA ACTACTTGCC GAGCAGCAGT TCAACATCAT ATGATGATGA TGAT---AT**  
 S1AT2 **ATATTCGTGC ATATATACCG GTTCTCTTCA ACTACTTGCC GAGCAGCAGT TCAACATCAT ATGATGATGA -----AT**  
 SpA22 **ACAA-----ATTTCGTCA ATGAGAGCGG ATACTACTTT GGAGACCATT TAAGAAAAG TTTTTCAGCC CGACCTAAAT**  
 S1AT3 **CTCTTCGTGC ATATATACCG GTTCTCTTCA ACTACTTGCC GAGCAGCAGT TCAACATCAT ATGATGATGA AT---GA TGAT-----**  
 SpA33 **CTCTTCGTGC ATATATACCG GTTCTCTTCA ACTACTTGCC CAACAGCAGT TCAACATCAT ATGATGATGA TGAT-----**

561 640

S1AT1 --GCTTGAAA AATCATTGGC CGAGACGCTA ACCAAGTTTT ACCCTTTTGC TGGAAAGATT GCAAAAAGATA TTGATCCATT  
 SpA11 AAGCTTGAAA AATCATTGGC GGAGACGCTA ACCAAGTTTT ACCCTTTTGC TGGAAAGATT GCAAAAAGAT--GATCCATT  
 S1AT2 AAGCTTGAAA AATCATTGTC GGAGACGCTA ACCAAGTTTT ACCCTTTTGC TGGAAAGATT AGAAAAGGCA TTGATCCATT  
 SpA22 AAGCTTGAAA AATCATTATC GGAGACGCTA ACCAAGTTTT ACCCTTTTGC TGGAAAGATT AGAAAAGATA TTGATCCATT  
 S1AT3 AAGCTTGAAA AATCATTGGC GGAGACGCTA ACCAAGTTTT ACCCTTTTGC TGGAAAGATT GCAAAAAGAT--GATCCATT  
 SpA33 AAGCTTGAAA AATCATTGGC GGAGACGCTA ACCAAGTTTT ACCCTTTTGC TGGAAAGATT GCAAAAAGAT--GATCCATT

641 720

S1AT1 **CTCCATTGAC TGCAATGATG AAGGTGTTGA ATATGTTCAA ACCAAAGTCA ATGCAGACGA TCTCGCCCAA TTCTCCGTG**  
 SpA11 **CTCAATCGAC TGCAATGATG AAGGTGTTGA ATATGTTCAA ACCAAAGTCA ATGCAGACGA TCTCGCCCAA TTCTCCGTG**  
 S1AT2 **TTCCATCGAC TGCAATGATG AAGGTATTTGA ATATGTTCAA ACCAAAGTCA ATGCAGACGA TCTCGCCCAA TATCTCCGTG**  
 SpA22 **TTCCATCGAC TGCAATGATG AAGGTATTTGA ATATGTTCAA ACCAAAGTCA ATGCAGACGA TCTCGCCCAA TATCTCCGTG**  
 S1AT3 **CTCCATTGAC TGCAATGATG AAGGTGTTGA ATATGTTCAA ACCAAAGTCA ATGCAGACGA TCTCGCCCAA TTCTCG---G**  
 SpA33 **CTCAATCGAC TGCAATGATG AAGGTGTTGA ATATGTTCAA ACCAAAGTCA ATGCAGACGA TCTCGCCCAA TTCTCG---G**

721 800

S1AT1 **GTCAAGCCCA TAATGATAGT GAGTCGTCTT TGATTGATCT TCTTCCAATA AAAGATGTCG AGCCATCATC GCCATCAGAT**  
 SpA11 **GTCAAGCCCA TAATGATATT GAGTCGTCTT TGATTGATCT TCTTCCAATA ATAGATGTTG AGCCATCATC GCCATCAGAT**  
 S1AT2 **GTCAAGCCCA TAATGATATT GAGTCGTCTT TGATTGATCT TCTTCTGTGA ATGCATCGTC TACCATCA---AGT**  
 SpA22 **GTCAAGCCCA TAATGATATT GAGTCATCTT TGATTGATCT TCTTCTGTGA ATGCATCGTC TACCATCA---AGT**  
 S1AT3 **GTAAAGACGA TGATGATATT GAGTCGTCTT TGATTGATCT TCTTCCAATA AAAGATGTTG AGCTATCATC GCCATCAGAT**  
 SpA33 **GTAAAGA---TGATGATATT GAGTCGTCTT TGATTGATCT TCTTCCAATA AAAGATGTTG AGCCATCATC GCCATCAGAT**

801 880

S1AT1 **CCGTTATTGG GTGTCCAAGT GAATGTATTT AATAACGGAG GAGTAACCAT TGGGATACAA ATTTACATA TCGTAGCTGA**  
 SpA11 **CCGTTATTGG GTGTCCAAGT GAATGTATTT AATAACGGAG GAGTAACCAT TGGGATACAA ATTTACATA TCGTAGCTGA**  
 S1AT2 **CCATTATTGG GTGTCCAAGT GAATGTATTT AATAACGGAG GTGTAACCAT AGGATACAA ATTTACATA TCGTAGCTGA**  
 SpA22 **CCATTATTGG GTGTCCAAGT GAATGTATTT AATAACGGAG GAGTAACCAT AGGATACAA ATTTACATA TCGTAGCTGA**  
 S1AT3 **CCGTTATTGG GTGTCCAAGT GAATGTATTT AATAACGGAG GAGTAACCAT AGGATACAA ATTTACATA TCGTAGCTGA**  
 SpA33 **CCGTTATTGG GTGTCCAAGT GAATGTATTT AATAACGGAG GAGTAACCAT AGGATACAA ATTTACATA TCGTAGCTGA**

881 960

S1AT1 **TGCTTTCACT ATGGCAACAT TTGTAATGA ATGGGCGCAC ACTTGCCCTTA CAGGCCGGAC CGTCAGTA---ATA**  
 SpA11 **TGCTTTCACT TCAGCTACAT TTGTAATGA ATGGGCGCAC ACTTGCCCTTA CAGGCCGGAC CATCAGTACT ACACAAGATA**  
 S1AT2 **TGCTTTCACT TTAGTAAAT TTGTAATGA ATGGGCGCAC ACCACCCTTA CAGGCCGGAT GCCACTAGAT AAT-----**  
 SpA22 **TGCTTTCACT TTAGTAAAT TTGTAATGA ATGGGCGCAC ACTACCCTTA CAGGCCGGAT GTCACATAGT AAT-----**  
 S1AT3 **TGCTTTCACT TTAGTACAT TTGTAATGA ATGGGCGCAC ACTAACACGT TGTCGTGAT GCCCTAGAT AATAATGACC**  
 SpA33 **TGCTTTCACT TTAGTACAT TCGTAAATGA ATGGGCGCAC ACTAACACGT TGTCGTGAT GCCACAAGAT AATAATGACC**

961 1040

Fig. S1. (Continued)

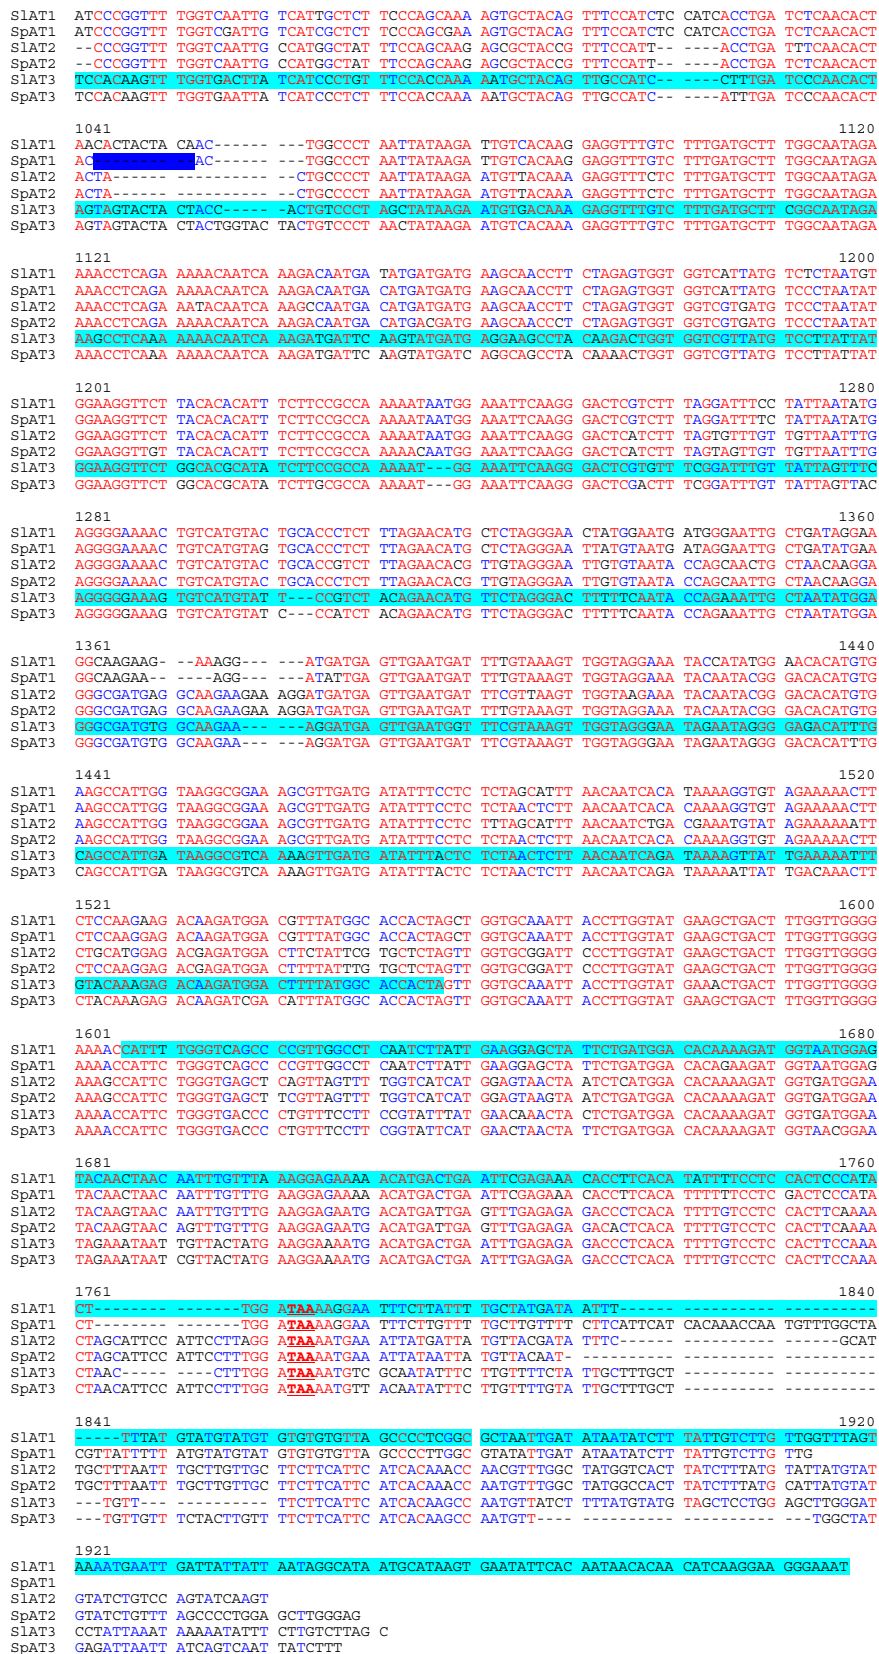

**Fig. S1.** Sequence alignment of *Solanum lycopersicum* and *Solanum pennellii* chromosome 1 acyltransferase alleles. The region of *SpAT1* containing a 10-bp deletion is highlighted in blue. The 5' region of *SpAT2* lacking similarity to *SlAT2* is highlighted in yellow. The regions used for creating the VIGS constructs to suppress a single AT gene are highlighted in light blue, and the sequence used to suppress all three AT genes at once is highlighted in gray. Nucleotides where 80% of the sequences match the consensus are red, and those where 50% match the consensus are blue. Start and stop codons are underlined. There are no introns in these genes.

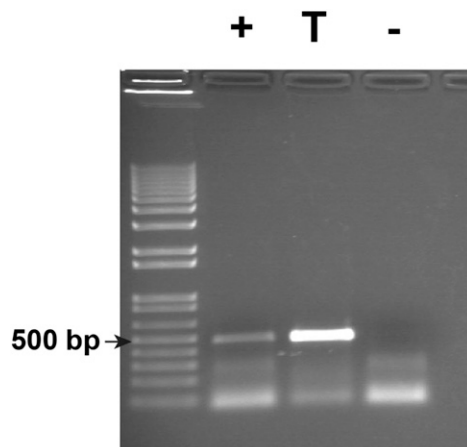

**Fig. S2.** RT-PCR analysis of *SIA T2* expression. RNA from stem and petiole tissue (+), trichomes isolated from stems and petioles (T), or stem and petiole tissue after removal of trichomes (–) was used for RT-PCR analysis of *SIA T2* expression. Expression was detected in the intact stem and petiole sample, as well as the isolated trichome sample. No *SIA T2* expression was detected in stem and petiole tissue after removal of the trichomes, indicating that expression was primarily in the trichomes.

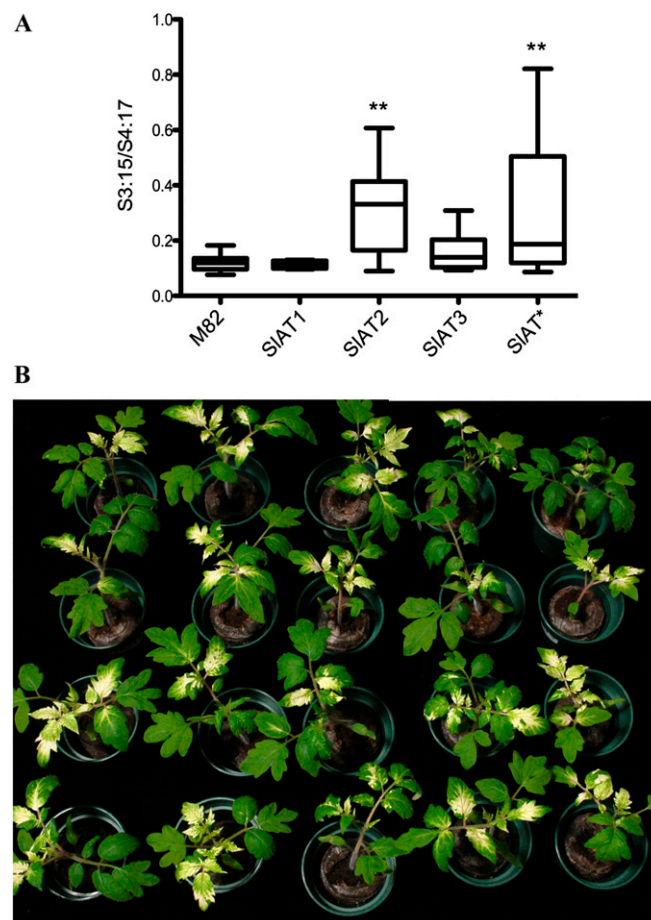

**Fig. S3.** (A) VIGS of *SIA T2* results in an increase in the ratio of unacetylated S3:15 to acetylated S4:17. Sequences for VIGS were chosen either to target a specific *SIA T* mRNA (*SIA T1*, -2, and -3) or to silence all three genes (*SIA T\**). Data are shown as box and whisker plots of the ratios of triacyl sucrose (S3:15) to tetra-acyl sucrose (S4:17), with whiskers showing the minimum and maximum. Only the *SIA T2* and *SIA T\** constructs showed a significant change in the ratio of S3:15/S4:17 compared with M82 ( $P < 0.05$ , Mann-Whitney rank sum test). Similar results were obtained for the ratio of the other pair of major acyl sucroses, S3:22 and S3:24. Sample number: M82  $n = 20$ ; *SIA T1*, *SIA T2*, and *SIA T3*  $n = 10$ ; *SIA T\**  $n = 17$ . (B) Suppression of *phytoene desaturase* (*PDS*) by VIGS in M82 plants illustrating heterogeneous reduction in gene expression.



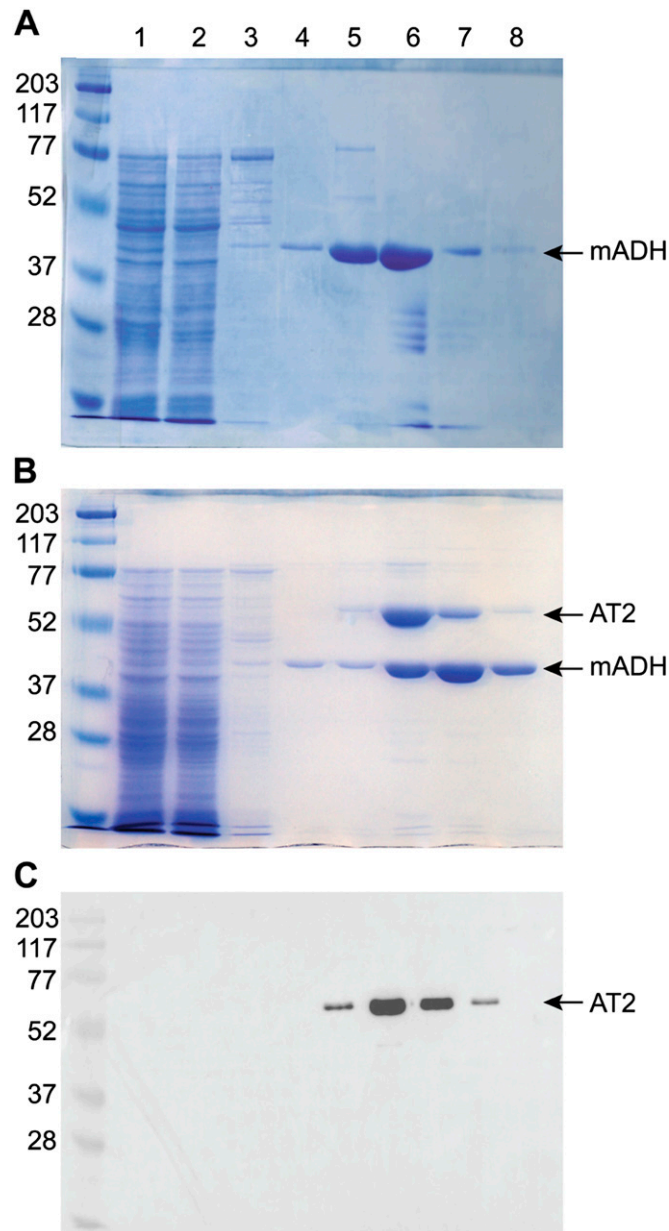

**Fig. S5.** Purification of recombinant SIAT2 fusion protein from *Pichia pastoris* yeast cells. Total soluble protein isolated from untransformed *Pichia* X33 cells or cells expressing SIAT2 were used for Ni-affinity chromatography. Shown are Coomassie blue-stained SDS/PAGE gels for X33 control (A) and SIAT2-expressing cells (B). The predicted molecular mass of recombinant SIAT2 is 56 kDa. The other protein binding to the Ni-resin at ~40 kDa was identified by mass spectrometry to be a *Pichia* mitochondrial alcohol dehydrogenase (mADH; GenBank accession CAY69102). (C) Results from an immunoblot of a gel identical to B that was probed with anti-cMyc-HRP antibody. Lanes are as follows: 1, crude extract; 2, protein not bound to Ni-resin; 3, 20 mM imidazole wash; 4–8, 200-mM imidazole elution fractions. Sizes of protein markers (kDa) are shown on left.





**Table S1. Peak areas from extracted ion chromatograms of the formate adducts of acyl sugars from IL1-3 incubated with an untransformed X33 control or with SIAT2**

| Acyl sugar       | Nominal $m/z$ of $[M+\text{formate}]^-$ | Retention time (min) | X33 control peak area | AT2 peak area ion counts/minute |
|------------------|-----------------------------------------|----------------------|-----------------------|---------------------------------|
| S3:15 (5,5,5)    | 639                                     | 3.30                 | 2,177.321             | 1,300.682                       |
| S4:17 (2,5,5,5)  | 681                                     | 3.36                 | 10.348                | 1,164.307                       |
| S3:16 (5,5,6)    | 653                                     | 3.37                 | 87.728                | 26.277                          |
| S4:18 (2,5,5,6)  | 695                                     | 3.42                 | 0.637                 | 34.094                          |
| S3:20 (5,5,10)   | 709                                     | 3.60                 | 245.849               | 54.226                          |
| S4:22 (2,5,5,10) | 751                                     | 3.64                 | ND                    | 139.034                         |
| S3:21 (5,5,11)   | 723                                     | 3.63                 | 489.74                | 190.61                          |
| S4:23 (2,5,5,11) | 765                                     | 3.68                 | ND                    | 275.356                         |
| S3:22 (5,5,12)   | 737                                     | 3.69                 | 2,071.95              | 1,180.051                       |
| S4:24 (2,5,5,12) | 779                                     | 3.79                 | 30.595                | 1,662.847                       |
| S3:23 (5,6,12)   | 751                                     | 3.72                 | 240.331               | 48.45                           |
| S4:25 (2,5,6,12) | 793                                     | 3.79                 | ND                    | 187.259                         |

Acyl sugars were identified according to their  $m/z$  and retention time, as well as from mass spectra generated using higher collision energy (1). All triacyl sucroses identified were acetylated regardless of the length of the attached acyl chains, as shown by the increase in peak areas for the corresponding tetra-acyl sucroses containing an acetyl group. ND, not detected.

- Schillmiller A, et al. (2010) Mass spectrometry screening reveals widespread diversity in trichome specialized metabolites of tomato chromosomal substitution lines. *Plant J* 62:391–403.
